# Supplementary material for: The Influence of Different Pretreatment Methods on Color and Pigment Change in Beetroot Products
Source: MDPI journal article supplement (doi:10.3390/molecules26123683), 2021-06-16
Supplement: s1 [file s1]

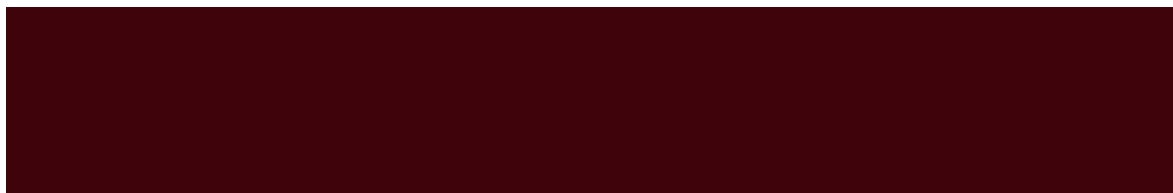

Figure S1. Color of beetroot obtained from color measurement

| Pre-treatment   | Juice obtained after FD                                                              |                 |                                                                                       |  |
|-----------------|--------------------------------------------------------------------------------------|-----------------|---------------------------------------------------------------------------------------|--|
| -               |    |                 |                                                                                       |  |
| Steam<br>10 min |   | Steam<br>15 min |   |  |
| US<br>10 min    |  | US<br>15 min    |  |  |

Figure S2. Outer morphology of beetroot powders obtained after Freeze-Drying (FD),

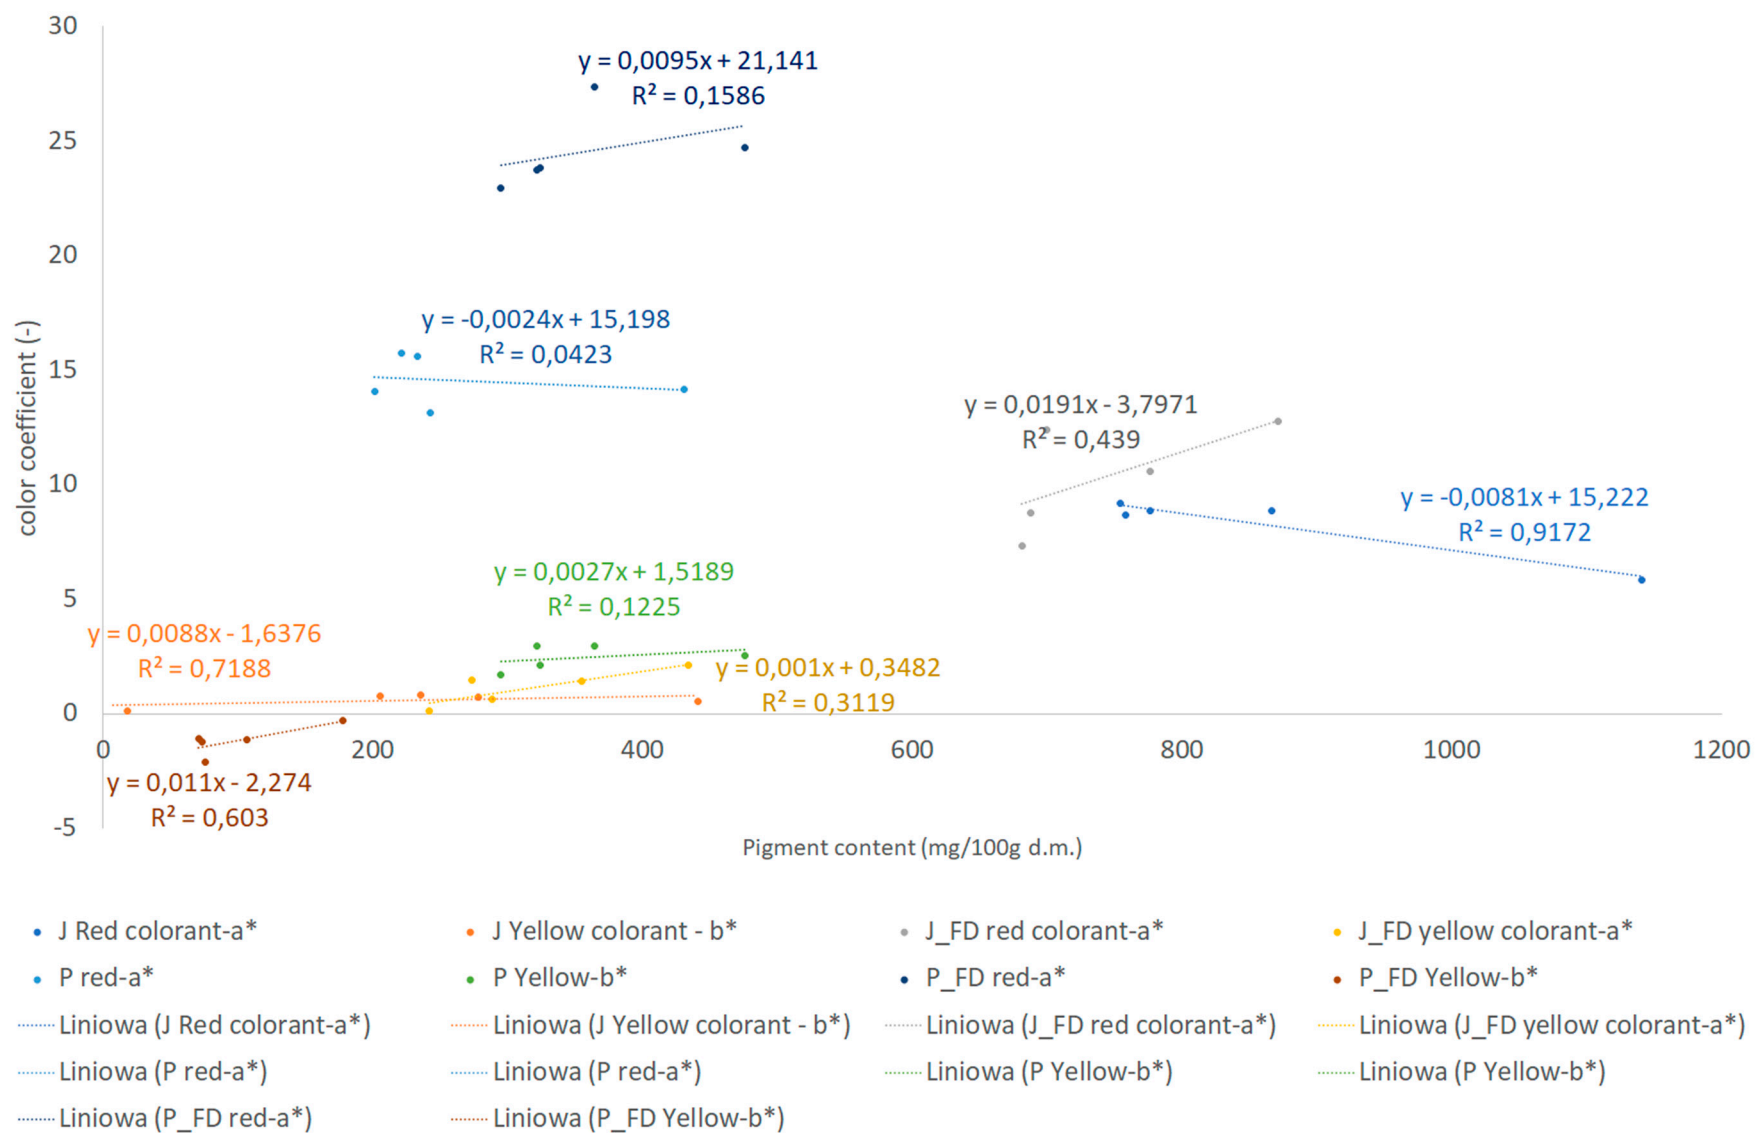

Figure. S3. Correlation between the colorant content (Red-betalain, Yellow- vulgaxanthin-I) and the color coefficient a\* or b\*
